# Supplementary material for: VOICES: the value of 6-month clinical evaluation in stroke. The protocol for a planned qualitative study to ascertain the value of stroke follow-up to people affected by stroke
Source: PubMed Central journal article supplement — BMJ Open. 2014 Oct 28;4(10):e006384. doi: 10.1136/bmjopen-2014-006384 (PMC4212190; doi:10.1136/bmjopen-2014-006384), 2014-10-28
Supplement: bmjopen-2014-006384.draft_revisions.pdf [file bmjopen-2014-006384.draft_revisions.pdf]

# BMJ Open

## **VOICES: the Value Of sIx-month Clinical Evaluation in Stroke - A qualitative study to ascertain the value of stroke follow-up to people affected by stroke**

|                                 |                                                                                                              |
|---------------------------------|--------------------------------------------------------------------------------------------------------------|
| Journal:                        | <i>BMJ Open</i>                                                                                              |
| Manuscript ID:                  | bmjopen-2014-006384                                                                                          |
| Article Type:                   | Protocol                                                                                                     |
| Date Submitted by the Author:   | 14-Aug-2014                                                                                                  |
| Complete List of Authors:       | Jenkins, Colin; Wye Valley NHS Trust, Stroke Services<br>Price, Fiona; Wye Valley NHS Trust, Stroke Services |
| <b>Primary Subject Heading</b>: | Rehabilitation medicine                                                                                      |
| Secondary Subject Heading:      | Evidence based practice, Health services research, Qualitative research, Rehabilitation medicine             |
| Keywords:                       | Stroke < NEUROLOGY, QUALITATIVE RESEARCH, STROKE MEDICINE                                                    |
|                                 |                                                                                                              |

SCHOLARONE™  
Manuscripts

**VOICES: the Value Of six-month Clinical Evaluation in Stroke - A qualitative study to ascertain the value of stroke follow-up to people affected by stroke**

Protocol Version 1.4 Dated 8<sup>th</sup> April 2014

**Chief Investigator**

Dr. Colin Jenkins  
Consultant Physician, Geriatric Medicine and Stroke Services Herefordshire  
NHS  
Wye Valley NHS Trust  
The County Hospital  
Union Walk  
Hereford HR1 2ER  
United Kingdom  
01432 355444 Ext. 5482  
[colin.jenkins@wvt.nhs.uk](mailto:colin.jenkins@wvt.nhs.uk)

**Co-Investigator**

Dr. Fiona Price  
Stroke Research Practitioner  
Stroke Team Office  
Wye Valley NHS Trust  
The County Hospital  
Union Walk  
Hereford HR1 2ER  
United Kingdom  
01432 355444 Ext. 5454 or 2955  
07584 952501  
[fiona.price@wvt.nhs.uk](mailto:fiona.price@wvt.nhs.uk)

Key words: Stroke, Follow-up, Value, Carers, Review

Word count: 3796

## ABSTRACT

### Introduction

The National Clinical Guidelines for Stroke recommend 'routine follow-up of patients six months post discharge'. The Sentinel Stroke National Audit Programme sets a standard of six months post admission follow-up, capturing data on process and outcomes.

There appears to be no convincing model of stroke follow-up at six months, and despite evidence of unmet need in almost 50% of stroke survivors one to five years after their stroke, little work focuses on the first twelve months of recovery.

By listening to the living experiences of stroke, the research aims to tailor the stroke care pathway to the needs of those affected.

### Methods and analysis

A focus group of six stroke survivors and carers will be invited to identify appropriate interview questions about the value of follow-up at six months, ensuring that this study has its genesis in the participant experience.

A pilot study of four stroke survivors will ascertain the feasibility of the method. 30 stroke survivors from the follow-up clinic will be invited to take part in semi-structured interviews. Raw data, in the form of digital recordings of the interviews, will be transcribed. Interview transcriptions will be checked by the participant for accuracy prior to analysis using NVivo<sup>®</sup> software. Literal and reflective narrative analysis will be used to code transcribed text to examine shared themes and reflect on content.

### Ethics and dissemination

Study documentation has been reviewed by the Coventry and Warwickshire Research Ethics Committee; the chief investigator met with the committee to scrutinise the study and justify its methodology. The committee has approved this study.

A copy of the final report will be given to participants, the Stroke Association, the local Clinical Commissioning Group and participants' GP's. It is intended to disseminate the results locally by presentation to the Trust board, at academic conferences and by publication in a peer-reviewed scientific journal.

## STRENGTHS AND LIMITATIONS

### Strengths –

- patient and carer involvement – interview questions arise from stroke survivors, not from the researcher’s assumption
- detailed, holistic data
- lived and living, active histories

### Limitations –

- geographically specific, but may be generalisable to others in similar locations
- relatively small sample size, but close to 30 hours of data is broad and deep, and should providing vivid, compelling accounts
- subjectivity of qualitative style is inevitable & acknowledged

## LAY SUMMARY

This study will examine the value of the six month follow-up clinic to people affected by stroke. It seeks to explore peoples’ expectations of the follow-up and evaluate its impact on the practical and psychological aspects of living with stroke. It is intended that this study will provide valuable evidence for commissioners to inform decisions about stroke service development.

The study will recruit up to 30 individuals six months after their stroke. A single semi-structured interview will be conducted with each person in a clinical setting or person’s home, depending upon their choice. Interviews will last a maximum of one hour, and can be undertaken in short stages (e.g. 20 minutes) if the participant prefers. The interviews will be digitally recorded and transcribed data will be analysed to examine themes and key words.

Transcribed raw data will be entered into a qualitative analysis package by Dr. Price. Coded data will be analysed and interpreted by both researchers. The resulting data will arise from an active, collaborative partnership between participant as expert and researcher, leading to a co-creation of knowledge. In collaborative research, the participants are experts of their own experiences; the role of the researcher is to make sense of this insight and co-construct new knowledge by sharing understanding.

By listening to the living experiences of stroke survivors, the research aims to provide a clear rationale for the six month follow-up and tailor the long-term stroke care pathway to the needs of those affected. Much research examines practical outcomes after stroke, but little work has focused on the *value* of follow-up after stroke as experienced by the patient. This study aims to build on the work ‘Feeling Overwhelmed’<sup>1</sup> by examining if there is emotional or practical benefit from attending a follow-up appointment; it also aims to

1  
2  
3 provide a patient-centred evidence-base for the National Stroke Strategy<sup>2</sup>  
4 recommendation for follow-up at six months.  
5  
6

## 7 **BACKGROUND AND RATIONALE**

8 The National Clinical Guidelines for Stroke recommend 'routine follow-up of  
9 patients six months post discharge and annually after a stroke' and 'any  
10 patient with residual impairment after the end of initial rehabilitation should be  
11 offered a formal review at least every six months, to consider whether further  
12 interventions are warranted'. These recommendations are a consensus view  
13 of the expert working party<sup>2</sup>.  
14  
15

16  
17 The Sentinel Stroke National Audit Programme (SSNAP) sets a standard of  
18 six months post admission follow-up assessment ( $\pm 2$  months): this captures  
19 data on process and some outcomes<sup>3</sup>.  
20  
21

22 There appears to be no convincing theoretical model of stroke follow-up at six  
23 months; there is also a notable discrepancy between six months post  
24 admission and six months post discharge recommended by SSNAP and the  
25 National Clinical Guidelines for Stroke respectively. Two studies suggest that  
26 some patients will benefit from physiotherapy<sup>4,5</sup>. Forster *et al.* however found  
27 no evidence for a structured reassessment at six months in terms of resource  
28 usage<sup>6</sup>.  
29  
30  
31

32 Some person-centred qualitative evidence is available from the Stroke  
33 Association survey 'Feeling Overwhelmed: the emotional impact of stroke' of  
34 2700 people affected by stroke<sup>1</sup>. This research examined the emotional  
35 impact of stroke on survivors, their carers and families and highlighted the  
36 need for further research into what they describe as an 'underappreciated  
37 problem'<sup>1</sup>. Finally, Martin Gower highlighted the need to focus on service user  
38 and carer involvement in helping to shape the stroke care agenda in the  
39 Comprehensive Local Research Network (CLRN) 'Celebrating Achievements'  
40 conference<sup>7</sup>.  
41  
42  
43  
44

## 45 **PATIENT BENEFIT**

46 There is evidence of unmet need in almost 50% of stroke survivors between  
47 one and five years after the stroke<sup>8</sup> though little work focuses on the first  
48 twelve months of recovery. Our six month consultant-led follow-up clinic  
49 currently examines the needs of local patients and their carers.  
50  
51

52 This study aims to provide patient benefit by having a positive impact on the  
53 short to medium term holistic physical and psychological well-being of the  
54 patient and their carers. By ascertaining the value of follow-up intervention  
55 from the stroke survivor's perspective, we aim to provide a beneficial service  
56 tailored to the needs of individuals. The provision of a follow-up service at six  
57  
58  
59  
60

1  
2  
3 months has been timed according to the National Clinical Guidelines for  
4 Stroke<sup>2</sup>, but there is no clear evidence to show why six months has been  
5 chosen as an appropriate time. This study will ascertain the value of the  
6 follow-up directly from the living experiences of the stroke survivors and  
7 carers as experts, and could lead to evidence for follow-up at a different time.  
8 Results from this study could be incorporated into the National Clinical  
9 Guidelines for Stroke and ultimately achieve benefit for all users of stroke  
10 services within the NHS.  
11  
12

## 13 14 15 **OBJECTIVES**

16 Principle objectives:

- 17 ○ What is the value to people affected by stroke of a six month follow-up  
18 clinic?
- 19 ○ Is six months post stroke the best time?

20  
21 Secondary objectives:

- 22 ○ The study will systematically review previous research in this area and  
23 seek to fill the specific gap in knowledge about the value of follow-up.
- 24 ○ The study will follow a given methodology, a patient-centred,  
25 constructivist qualitative philosophy, in order to collect robust data.
- 26 ○ The term 'value' will be examined to determine how it is perceived and  
27 interpreted by stroke survivors.
- 28 ○ Data will be examined using narrative analysis to gain the lived and  
29 living experience of stroke survivors.
- 30 ○ Results will inform local stroke provision.  
31  
32  
33  
34

## 35 36 **TRIAL DESIGN, METHODOLOGY AND METHOD**

37 This is a qualitative study using a convenience sample. The philosophy is to  
38 use a qualitative, constructivist, interpretive method to co-construct knowledge  
39 about the value of follow-up, since a person centred approach was not the  
40 focus of previous studies assessing the value of stroke follow-up. It is  
41 intended that this study will provide valuable evidence to inform decisions  
42 about local stroke service development. This is particularly important as there  
43 has been limited service user engagement in service design previously.  
44  
45

46  
47 The study will use a convenience sampling method, since people affected by  
48 stroke will be approached in the clinic offered at the hospital. There will be no  
49 selection by the researchers; all those who attend will be offered the chance  
50 to take part regardless of age, ability or any other criteria other than those  
51 exclusion criteria listed. Carers or relatives of stroke survivors who could act  
52 as interpreters would be welcome to participate in the study with the  
53 individual.  
54  
55  
56  
57  
58  
59  
60

1  
2  
3 Potential participants will be approached at the end of their six month clinical  
4 follow-up appointment and invited to participate within the next two weeks.  
5 Written information about the study and a contact number will be given out if  
6 interest is initially expressed. Within the next week a researcher will make  
7 contact to invite formal enrolment, gain consent and arrange the interview  
8 date, time and venue. It is intended to hold interviews within two weeks of the  
9 clinic appointment. This will allow participants to prepare for the interview by  
10 making notes or reflecting on what they valued in the follow-up. The aim is to  
11 recruit up to 30 stroke survivors into the study.  
12  
13  
14

15  
16 A semi-structured interview will be conducted in the hospital or person's  
17 home, depending upon their choice. Interviews will last a maximum of one  
18 hour. As the interview style is semi-structured, the length of interview and  
19 depth of information proffered will be determined by the participant. This style  
20 of interview allows the participant to offer as much or little detail as they see  
21 fit, since the topic is likely to require some emotional investment from each  
22 individual. The emotional state and vulnerability of the individual will be  
23 considered, so interviews could be staged into short time sections in order not  
24 to tire the individual and to encourage the participant to feel they were needed  
25 and not 'being used'. The physical and psychological safety of the participant  
26 will be paramount. If a participant should disclose information which was of  
27 concern to the interviewer, the interviewer will follow the multi-agency  
28 safeguarding adults policy agreed by the local Adult Safeguarding Board.  
29  
30  
31  
32

33  
34 The interviews will be digitally recorded and transcribed, then stored on-line in  
35 a password-protected file only accessible by the researchers and one  
36 secretary. Transcriptions will be analysed using NVivo<sup>®</sup> software. The use of  
37 qualitative software will standardise analysis, resulting in broad themes which  
38 can be interpreted and illustrated using verbatim quotations.  
39  
40

41 Narrative analysis will be used to code transcribed text to examine themes  
42 and key words from the raw data. Narrative analysis is an examination of  
43 individual stories that can contribute to an understanding of that individual's  
44 experience. In this case the 'stories' are the content of the interview, the lived  
45 and living experience of stroke as described by the stroke survivor in the  
46 context of an interview conversation. Narrative analysis, in which experiences  
47 are constructed from dialogic aspects of narrative<sup>9</sup>, can examine data from a  
48 literal or reflexive approach. Both will be used in this study; literal analysis will  
49 examine particular language, for example repeated words or phrases, and  
50 reflexive analysis will include the researchers' and participants' contribution to  
51 the co-creation of knowledge through the interpretation and reflection on  
52 content<sup>10</sup>. Verbatim quotes will be used to illustrate themes or recurrent  
53 points.  
54  
55  
56  
57  
58  
59  
60

1  
2  
3 All data will be anonymised and potential participants will be advised of this  
4 when giving informed consent. Participants will also be offered the opportunity  
5 to validate the transcription by checking a copy of the transcribed interview for  
6 accuracy. Transcriptions will be posted or emailed to the participant,  
7 whichever method they prefer, and the researcher practitioner's contact  
8 number and e-mail will be provided for them to call or e-mail with their  
9 comments. They will be advised that they are being asked to ensure that the  
10 transcription is an accurate record of their interview and to confirm again that  
11 they are happy for quotes to be used in the final report. This process of  
12 validation will give participants ownership of the data and further allow them to  
13 agree to its use. This collaborative approach will enable the co-construction of  
14 new knowledge between the researchers, and the participants as experts.  
15  
16  
17  
18

19  
20 The full study is expected to last two years, with a focus group and pilot  
21 interviews taking place in the first year. Transcription, data analysis and report  
22 writing are anticipated to be completed in the second year.  
23

## 24 **ELIGIBILITY**

### 25 Inclusion

- 26 ○ Those attending the six month follow-up clinic appointment.
- 27 ○ Adults over the age of 18.
- 28 ○ Able to give informed consent, or proxy consent from a relative.
- 29 ○ Individuals with aphasia may take part if they have a close relative  
30 who can help make their views understood through verbal or written  
31 means.  
32

### 33 Exclusion

- 34 ○ Those who had a stroke less than six months ago.
- 35 ○ Age less than 18.
- 36 ○ Those who do not speak English fluently and who do not have an  
37 interpreter who can translate for them.
- 38 ○ Non-stroke life expectancy of less than six months.
- 39 ○ Individuals with dementia whose memory is impaired to a degree that  
40 they could not give meaningful consent
- 41 ○ Individuals who do not have capacity to consent.  
42

## 43 **RECRUITMENT**

44 The trial uses an opportunistic sampling strategy. Potential participants will be  
45 approached at the end of their clinical follow-up by the Chief Investigator (who  
46 runs the clinic) and invited to participate within the next two weeks. Written  
47 information about the study and the contact number of the researcher will be  
48 given out if interest is initially expressed. Within the next week the researcher  
49  
50  
51



1  
2  
3 will make contact to invite formal enrolment, gain consent and arrange the  
4 interview date, time and venue. The researcher will not be present in the clinic  
5 interview.  
6  
7

### 8 **CONSENT**

9 Informed, written consent will be sought for all participants. When initial  
10 interest is expressed, individuals will be given an information sheet and  
11 contact telephone numbers to take away with them. The researcher will gain  
12 written consent before the interview takes place. The participant will be given  
13 a copy of their signed consent form. Hard copies of consent forms will be  
14 stored securely at the study centre.  
15  
16

### 17 **DATA SOURCES AND MEASUREMENT**

18 Raw data will be in the form of digital recordings of the interviews. These will  
19 be transcribed to enable analysis to be completed efficiently. Transcribed  
20 interviews will be identified by a numerical code unique to each individual.  
21 Transcriptions will be analysed using NVivo<sup>®</sup> software. Transcriptions will only  
22 be read by Dr. Price, since there is potential to bias the results if the  
23 researcher who runs the clinic (Dr. Jenkins) also sees the interview content.  
24 The transcriptions will have been checked by the participant for accuracy prior  
25 to analysis. Coded data will be analysed by both researchers and there will be  
26 an iterative process of reflection on content by both researchers. Literal and  
27 reflective narrative analysis will be used to code transcribed text to examine  
28 shared themes and key words, and reflect on the content of the interviews.  
29 Verbatim quotes will be used to illustrate themes or recurrent points.  
30  
31  
32  
33  
34  
35

### 36 **QUALITY ASSURANCE**

37 The Chief Investigator and Co-Investigator have valid Good Clinical Practice  
38 certificates and are experienced researchers. The scientific quality of the  
39 study has been assessed by independent peer review of the proposal by a  
40 university lecturer, via the West Midlands South Comprehensive Local  
41 Research Network Research and Development team. It has also been  
42 scrutinised by the Trust, acting as sponsor. In addition, this proposal has been  
43 reviewed by the Research and Development team and the Research Design  
44 Service at study preparation and prior to commencement.  
45  
46  
47

48 Finally, the proposal has also been considered by a member of the stroke  
49 team who is not involved in the research but who has extensive knowledge of  
50 stroke and experience of working with patients in a person-centred way.  
51  
52

### 53 **CONFIDENTIALITY**

54 Digital interview recordings, written transcriptions and written analysis will be  
55 kept in a file on a password protected secure NHS network drive. Access to  
56 this file will be restricted to both named researchers and one member of  
57  
58  
59  
60

1  
2  
3 secretarial staff. All data will be anonymised and potential participants will be  
4 advised of this as part of the consent process. Hard copies of consent forms  
5 will be kept in a locked filing cabinet in a locked office.  
6  
7

## 8 **ACCRUAL AND ANALYSIS**

9 Sample size up to 30

10 The minimum recruitment is set at 12 to enable recruitment of one person a  
11 month, though it is expected that this will be exceeded. The maximum is  
12 calculated on the basis that saturation point will be reached, whereby no  
13 further new information will be gained by interviewing more participants. The  
14 data provided in interview will be rich and deep, so a relatively small sample  
15 size is justified.  
16  
17  
18

## 19 **ANALYSIS METHODS**

20 A narrative style of analysis will be used to examine shared themes and  
21 commonality in the interview transcriptions. NVivo<sup>®</sup> software will be used to  
22 standardise the analysis. Narrative analysis centres on the structured study of  
23 stories or oral narrative accounts of complex and nuanced experience, in this  
24 case taking the form of interview responses. Individual interview stories can  
25 be categorised and analysed by themes within the account (thematic analysis)  
26 or by the way the interview conversation is structured; for example examining  
27 the use of metaphor would result in a structural analysis of the narrative. It is  
28 anticipated that both types of analysis will be used in this study.  
29  
30  
31  
32

33 There is the potential for the Chief Investigator to be biased against any  
34 negative narratives arising from interviews since it is his clinic under scrutiny.  
35 In order to mitigate this possibility, raw data will be entered into the NVivo<sup>®</sup>  
36 qualitative software package by Dr. Price, removing the need for the Chief  
37 Investigator to examine raw data. Analysis of coded, processed data will then  
38 be undertaken by both researchers in order to answer the research question.  
39  
40  
41  
42

## 43 **LONG-TERM STORAGE OF DATA**

44 Digital voice recordings of interviews, transcribed interviews and analysed  
45 data will be kept for five years after publication, and then destroyed. The  
46 rationale for keeping data for this length of time is to allow sufficient time for  
47 publication of the research in a peer-reviewed journal and subsequent  
48 academic review.  
49  
50

## 51 **PATIENT AND PUBLIC INVOLVEMENT**

52 The National Clinical Guidelines for Stroke<sup>2</sup> advise that the views of stroke  
53 patients and their carers should be considered when evaluating a service, and  
54 this study aims to answer that call.  
55  
56  
57  
58  
59  
60

1  
2  
3 A focus group of six stroke survivors and their carers will be invited to discuss  
4 the study and proposed method to ensure that the approach is appropriate  
5 and robust. The focus group discussion will also be used to devise and  
6 validate the interview questions, to ensure that attention is paid to the views  
7 and feelings of stroke survivors. Members of the focus group will consist of  
8 individuals who will not have attended a recent follow-up appointment so they  
9 will be able to approach the study from an independent viewpoint. Group  
10 members will be asked for their permission to have the discussion recorded.  
11 The content and feedback from this discussion will enable the focus of the  
12 resulting research questions to be precisely based on the views of patients  
13 and carers, thereby ensuring that this study has its genesis in the participant  
14 experience, not the researcher's interpretation of what that experience may  
15 be.  
16  
17  
18  
19

20  
21 Four stroke survivors who did not take part in the focus group will be recruited  
22 from the follow-up clinic to take part in a one-to-one pilot interview to ascertain  
23 the feasibility of the study method. Again, feedback will be sought from the  
24 pilot interviewees on the questions and the way the study was run, and final  
25 amendments to the full study will be made accordingly.  
26  
27

28  
29 Participants in both the pilot and main study will be offered the opportunity to  
30 validate the transcription by checking a copy of their interview for accuracy.  
31 This will give participants ownership of the data and further allow them to  
32 agree to its use. Participants will also be given a copy of the final report, to  
33 see the results of their involvement.  
34  
35

### 36 **ETHICAL CONSIDERATIONS**

37 The study proposal has been reviewed by the West Midlands South  
38 Comprehensive Local Research Network, and been peer reviewed by an  
39 independent university lecturer who acted as a reviewer.  
40  
41

42 All study documentation has been reviewed by the Coventry and  
43 Warwickshire Research Ethics Committee and the chief investigator met with  
44 the committee to scrutinise the study and justify its methodology. The  
45 committee has approved this study.  
46  
47

48  
49 Risk of breach of confidentiality will be minimised by the use of anonymised  
50 data. Participants will be asked to consent to direct quotations from interview  
51 being used in the final report, in the knowledge that they will not be named or  
52 their identity be inferred.  
53  
54

55 There is a minimal risk that people might become upset while talking about  
56 their experiences of stroke; Dr. Price is an experienced interviewer and will  
57 support people appropriately using active listening skills. People will not have  
58  
59  
60

1  
2  
3 to answer any questions they find uncomfortable and can withdraw at any  
4 time in the study; this will be made clear in the consent process.  
5 In the event of an individual becoming distressed, they will be asked if they  
6 wish to delay or discontinue the interview, and Dr. Price will ensure that  
7 someone is with the participant once the interview is completed. The  
8 interviewer will also be equipped to provide the participant with details of  
9 support organisations or help-lines should the need arise.  
10  
11

### 12 13 **ANTICIPATED PROBLEMS**

14 There might be a bias caused by the participant receiving additional attention  
15 by taking part in the interview; they might over-value the clinic appointment  
16 because additional attention has been paid to them and they place value on  
17 that process. Participants will be reminded that the focus of the study is the  
18 value of the clinic appointment, so as not to confound the results.  
19  
20

21  
22 Individuals may be reluctant to offer negative views about the clinic if they are  
23 aware that those views will be fed back to the consultant. It will be made clear  
24 in the informed consent process that i) data will not be attributable to them by  
25 name, ii) the consultant will not analyse raw data but will only examine the  
26 resulting themes, and iii) Dr. Price is not employed by the Trust and so she  
27 can offer an objective analysis of the results.  
28  
29

### 30 31 **POTENTIAL BENEFIT TO RESEARCH PARTICIPANTS**

32 For some individuals, participation may allow further opportunity to reflect on  
33 their development since their stroke or to take part in a worthwhile endeavour  
34 which could benefit others. In other words, participation may be beneficial  
35 since it enables them to have some influence or a role.  
36  
37

### 38 39 **EXPECTED OUTCOMES OF THE STUDY**

40 The study will inform the development of local stroke services in an area that  
41 has hitherto had little resource or clinical attention. The study will inform  
42 commissioners of the benefits to people affected by stroke of follow-up by  
43 stroke clinicians. The study will also enhance the theoretical basis for stroke  
44 follow-up. The study might show that there is no benefit to six month follow-up  
45 in its current SSNAP-based format but may suggest alternative approaches or  
46 timing of follow-up.  
47  
48

### 49 50 **DISSEMINATION OF RESULTS AND PUBLICATION POLICY**

51 A copy of the final study report will be given to the participants, participants'  
52 GP's, the Stroke Association and the local Clinical Commissioning Group. It is  
53 further intended to disseminate the results by presentation at academic  
54 conferences and by publication in a peer-reviewed scientific journal.  
55  
56  
57  
58  
59  
60

## TIMETABLE

The timetable is sub-divided into a pre-study set-up period, and the pilot and main study. Chart 1 shows the anticipated timing to gain approvals, run the focus group and amend the study based on focus group feedback.

### Chart 1: Pre-Study Timetable

*Chart 1 here*

Chart 2 shows the estimated timetable for the study, commencing May 2014 and anticipated to end in May 2016. Both investigators expect to be in post for the duration of the study.

### Chart 2: Study Timetable

*Chart 2 here*

## BUDGET SUMMARY

**Table 1**

|                                                                                                               | Year 1 (£)    | Year 2 (£)    | Total         |
|---------------------------------------------------------------------------------------------------------------|---------------|---------------|---------------|
| Salaries (typing costs at £1.50 per minute)*                                                                  | £1350*        | £1350*        | £1700         |
| Equipment (External computer hard drive and Digital encrypted Dictaphone)                                     | £390          | -             | £390          |
| Consumables (NVivo® software)                                                                                 | £835          | -             | £835          |
| Travel (Researcher to patient homes, and participants to venue plus parking costs)                            | £400          | -             | £400          |
| Other expenses<br>(Printing information and consent forms;<br>Postage; Literature: printing and access costs) | £400          | -             | £400          |
| <b>Total</b>                                                                                                  | <b>£3,375</b> | <b>£1,350</b> | <b>£4,725</b> |

\*The salary budget is designed to be used to pay one member of secretarial staff to transcribe interviews, and the typing cost is set to reflect the fact that transcription is in addition to their usual duties.

The budget is largely for initial capital costs to enable the study to be set up.

## TEAM EXPERTISE

The Chief Investigator (CI) has experience of acting as Principal Investigator for seven clinical stroke trials and has undertaken independent qualitative research in the past. The Co-Investigator has successfully completed independent doctoral level qualitative study. Her post is funded by the NIHR Clinical Research Network. Both researchers hold current Good Clinical

1  
2  
3 Practice certificates. In addition, both researchers have a person-centred  
4 focus and are motivated to gain the personal histories of people affected by  
5 stroke in order to inform service provision.  
6

### 7 **Acknowledgements**

8 We are very grateful to The Eveson Charitable Trust and The James Tudor  
9 Foundation for funding this study. Thanks also to Dr. Karima Kadi-Hanifi and  
10 the anonymous reviewers for their suggestions. Finally, we acknowledge the  
11 contribution of Ciara Harris – without her word-play skills this study would  
12 have no name!  
13  
14

### 15 **FUNDING BODIES**

16 The study has been funded by two local charities, The Eveson Charitable  
17 Trust and The James Tudor Foundation.  
18  
19  
20  
21

### 22 **CONTRIBUTORSHIP**

23 Dr. Colin Jenkins originally conceived the idea for the study and has made a  
24 substantial contribution to the design and methodology of the research  
25 protocol. He has reviewed the protocol content, researched the background to  
26 the issue and collaborated in the writing of the full document.  
27  
28

29 Dr. Fiona Price has drafted and revised the written protocol based on scrutiny  
30 by independent academic colleagues. She has also used her expertise in  
31 qualitative research design to devise a structured method for the research.  
32  
33  
34

### 35 **REFERENCES**

- 36 1 Stroke Association (2013) Feeling Overwhelmed: the emotional impact of  
37 stroke Retrieved from:  
38 <http://www.stroke.org.uk/involved/feeling-overwhelmed-report>  
39 Accessed 19th June 2013  
40  
41 2 Department of Health (2012) The National Clinical Guidelines for Stroke  
42 HMSO: London  
43  
44 3 Royal College of Physicians (2013) Sentinel Stroke National Audit  
45 Programme Retrieved from: <https://www.strokeaudit.org/> Accessed  
46 19<sup>th</sup> June 2013  
47  
48 4 Duncan PW, Sullivan KJ, Behrman AL, Azen SP, Wu SS, Nadeau  
49 SE, Dobkin BH, Rose DK, Julie K, Tilson JK, Cen S and Hayden SK  
50 Body-Weight-Supported Treadmill Rehabilitation after Stroke. *The*  
51 *New England Journal of Medicine* 2011; 364:2026-2036  
52  
53 5 Ferrarello F, Baccini M, Rinaldi LA, Cavallini MC, Mossello E,  
54 Masotti G, Marchionni N and Di Bari M Efficacy of  
55 physiotherapy interventions late after stroke: a meta-analysis *Journal*  
56  
57  
58  
59  
60

1  
2  
3 of *Neurology, Neurosurgery and Psychiatry* 2011;82: 136-143  
4

5 6 Forster A, Young J, Green J, Patterson C, Wanklyn P, Smith J,  
6 Murray J, Wild H, Bogle S and Lowson K Structured re-assessment  
7 system at 6 months after a disabling stroke: a randomised controlled  
8 trial with resource use and cost study *Age and Ageing* 2009; 38: 576–  
9 583  
10

11  
12 7 Comprehensive Local Research Network conference (2013) Celebrating  
13 Achievements and Planning for the Future 1<sup>st</sup> July 2013, Stratford  
14 Manor Hotel, Stratford-upon-Avon  
15

16  
17 8 McKeivitt C, Fudge N, Refern J, Sheldenkar A, Crichton S and Wolfe  
18 C UK stroke survivors needs survey London: *Stroke*  
19 *Association and Kings College London* 2011  
20

21  
22 9 Riessman CK Narrative Methods for the Human Sciences. 2008 Los  
23 Angeles, CA: Sage  
24

25  
26 10 Welsh E Dealing with Data: using NVivo in the Qualitative Data  
27 Analysis Process. *Forum: Quantitative Social Research* 2002; 3: (2),  
28 Art. 26  
29  
30  
31  
32  
33  
34  
35  
36  
37  
38  
39  
40  
41  
42  
43  
44  
45  
46  
47  
48  
49  
50  
51  
52  
53  
54  
55  
56  
57  
58  
59  
60

**VOICES: the Value Of six-month Clinical Evaluation in Stroke - A qualitative study to ascertain the value of stroke follow-up to people affected by stroke**

Jenkins and Price

**Chart 1: Pre-Study Timetable**

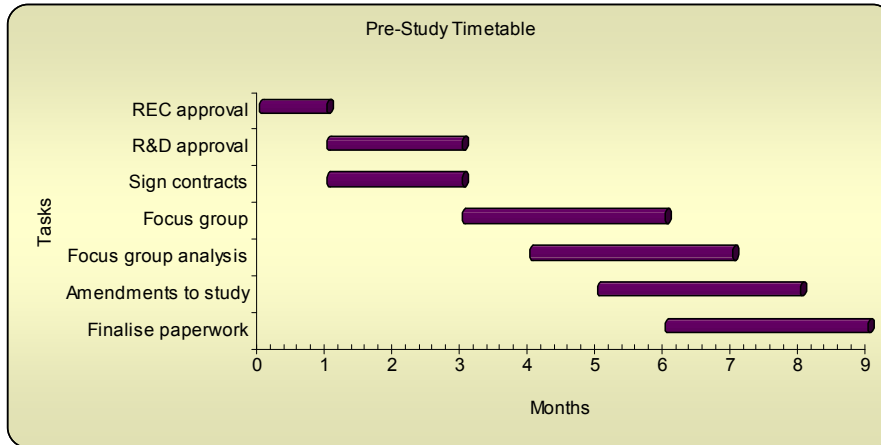

**Chart 2: Study Timetable**

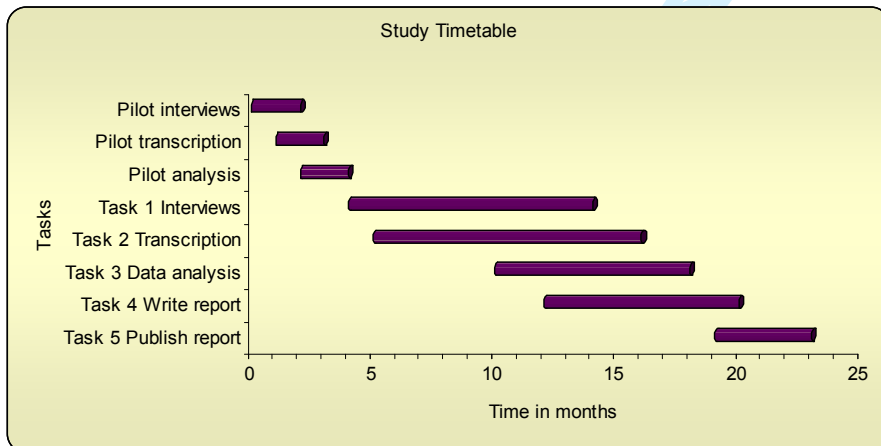



# BMJ Open

**VOICES: the Value Of sIx-month Clinical Evaluation in Stroke - The protocol for a planned qualitative study to ascertain the value of stroke follow-up to people affected by stroke**

|                                 |                                                                                                              |
|---------------------------------|--------------------------------------------------------------------------------------------------------------|
| Journal:                        | <i>BMJ Open</i>                                                                                              |
| Manuscript ID:                  | bmjopen-2014-006384.R1                                                                                       |
| Article Type:                   | Protocol                                                                                                     |
| Date Submitted by the Author:   | 01-Oct-2014                                                                                                  |
| Complete List of Authors:       | Jenkins, Colin; Wye Valley NHS Trust, Stroke Services<br>Price, Fiona; Wye Valley NHS Trust, Stroke Services |
| <b>Primary Subject Heading</b>: | Rehabilitation medicine                                                                                      |
| Secondary Subject Heading:      | Evidence based practice, Health services research, Qualitative research, Rehabilitation medicine             |
| Keywords:                       | Stroke < NEUROLOGY, QUALITATIVE RESEARCH, STROKE MEDICINE                                                    |
|                                 |                                                                                                              |

SCHOLARONE™  
Manuscripts

1  
2  
3 **VOICES: the Value Of six-month Clinical Evaluation in Stroke – The protocol**  
4 **for a planned qualitative study to ascertain the value of stroke follow-up to**  
5 **people affected by stroke**  
6

7  
8 Protocol Version 1.4 Dated 8<sup>th</sup> April 2014  
9

10  
11  
12  
13  
14 **Chief Investigator**

15 Dr. Colin Jenkins

16 Consultant Physician, Geriatric Medicine and Stroke Services Herefordshire  
17 NHS

18 Wye Valley NHS Trust

19 The County Hospital

20 Union Walk

21 Hereford HR1 2ER

22 United Kingdom

23 01432 355444 Ext. 5482

24 [colin.jenkins@wvt.nhs.uk](mailto:colin.jenkins@wvt.nhs.uk)  
25  
26  
27  
28

29 **Co-Investigator**

30 Dr. Fiona Price

31 Stroke Research Practitioner

32 Stroke Team Office

33 Wye Valley NHS Trust

34 The County Hospital

35 Union Walk

36 Hereford HR1 2ER

37 United Kingdom

38 01432 355444 Ext. 5454 or 2955

39 07584 952501

40 [fiona.price@wvt.nhs.uk](mailto:fiona.price@wvt.nhs.uk)  
41  
42  
43  
44  
45  
46

47 Key words: Stroke, Follow-up, Value, Carers, Review  
48  
49

50 Word count: 3805  
51  
52  
53  
54  
55  
56  
57  
58  
59  
60

## ABSTRACT

### Introduction

The National Clinical Guidelines for Stroke recommend 'routine follow-up of patients six months post discharge'. The Sentinel Stroke National Audit Programme sets a standard of six months post admission follow-up, capturing data on process and outcomes.

There appears to be no convincing model of stroke follow-up at six months, and despite evidence of unmet need in almost 50% of stroke survivors one to five years after their stroke, little work focuses on the first twelve months of recovery.

By listening to the living experiences of stroke, the research aims to tailor the stroke care pathway to the needs of those affected.

### Methods and analysis

A focus group of six stroke survivors and carers will be invited to identify appropriate interview questions about the value of follow-up at six months, ensuring that this study has its genesis in the participant experience.

A pilot study of four stroke survivors will ascertain the feasibility of the method. 30 stroke survivors from the follow-up clinic will be invited to take part in semi-structured interviews. Raw data, in the form of digital recordings of the interviews, will be transcribed. Interview transcriptions will be checked by the participant for accuracy prior to analysis using NVivo<sup>®</sup> software. Literal and reflective narrative analysis will be used to code transcribed text to examine shared themes and reflect on content.

### Ethics and dissemination

Study documentation has been reviewed by the Coventry and Warwickshire Research Ethics Committee; the chief investigator met with the committee to scrutinise the study and justify its methodology. The committee has approved this study.

A copy of the final report will be given to participants, the Stroke Association, the local Clinical Commissioning Group and participants' GP's. It is intended to disseminate the results locally by presentation to the Trust board, at academic conferences and by publication in a peer-reviewed scientific journal.

## STRENGTHS AND LIMITATIONS

### Strengths –

- patient and carer involvement – interview questions arise from stroke survivors, not from the researcher's assumption
- detailed, holistic data
- lived and living, active histories

### Limitations –

- geographically specific, but may be generalisable to others in similar locations
- relatively small sample size, but close to 30 hours of data is broad and deep, and should providing vivid, compelling accounts
- subjectivity of qualitative style is inevitable & acknowledged

## BACKGROUND AND RATIONALE

The National Clinical Guidelines for Stroke recommend 'routine follow-up of patients six months post discharge and annually after a stroke' and 'any patient with residual impairment after the end of initial rehabilitation should be offered a formal review at least every six months, to consider whether further interventions are warranted'. These recommendations are a consensus view of the expert working party<sup>1</sup>.

The Sentinel Stroke National Audit Programme (SSNAP) sets a standard of six months post admission follow-up assessment ( $\pm 2$  months): this captures data on process and some outcomes<sup>2</sup>.

There appears to be no convincing theoretical model of stroke follow-up at six months; there is also a notable discrepancy between six months post admission and six months post discharge recommended by SSNAP and the National Clinical Guidelines for Stroke respectively. Two studies suggest that some patients will benefit from physiotherapy<sup>3,4</sup>. Forster *et al.* however found no evidence for a structured reassessment at six months in terms of resource usage<sup>5</sup>.

Some person-centred qualitative evidence is available from the Stroke Association survey 'Feeling Overwhelmed: the emotional impact of stroke' of 2700 people affected by stroke<sup>6</sup>. This research examined the emotional impact of stroke on survivors, their carers and families and highlighted the need for further research into what they describe as an 'underappreciated problem'<sup>6</sup>. Finally, Martin Gower highlighted the need to focus on service user and carer involvement in helping to shape the stroke care agenda in the

1  
2  
3 Comprehensive Local Research Network (CLRN) 'Celebrating Achievements'  
4 conference<sup>7</sup>.

### 6 7 **PATIENT BENEFIT**

8 There is evidence of unmet need in almost 50% of stroke survivors between  
9 one and five years after the stroke<sup>8</sup> though little work focuses on the first  
10 twelve months of recovery. Our six month consultant-led follow-up clinic  
11 currently examines the needs of local patients and their carers.  
12

13  
14 This study aims to provide patient benefit by having a positive impact on the  
15 short to medium term holistic physical and psychological well-being of the  
16 patient and their carers. By ascertaining the value of follow-up intervention  
17 from the stroke survivor's perspective, we aim to provide a beneficial service  
18 tailored to the needs of individuals. The provision of a follow-up service at six  
19 months has been timed according to the National Clinical Guidelines for  
20 Stroke<sup>1</sup>, but there is no clear evidence to show why six months has been  
21 chosen as an appropriate time. This study will ascertain the value of the  
22 follow-up directly from the living experiences of the stroke survivors and  
23 carers as experts, and could lead to evidence for follow-up at a different time.  
24 Results from this study could be incorporated into the National Clinical  
25 Guidelines for Stroke and ultimately achieve benefit for all users of stroke  
26 services within the NHS.  
27  
28  
29  
30  
31

### 32 33 **OBJECTIVES**

34 Principle objectives:

- 35 ○ What is the value to people affected by stroke of a six month follow-up  
36 clinic?
- 37 ○ Is six months post stroke the best time?

38  
39 Secondary objectives:

- 40 ○ The study will systematically review previous research in this area and  
41 seek to fill the specific gap in knowledge about the value of follow-up.
- 42 ○ The study will follow a given methodology, a patient-centred,  
43 constructivist qualitative philosophy, in order to collect robust data.
- 44 ○ The term 'value' will be examined to determine how it is perceived and  
45 interpreted by stroke survivors.
- 46 ○ Data will be examined using narrative analysis to gain the lived and  
47 living experience of stroke survivors.
- 48 ○ Results will inform local stroke provision.

### 52 53 **TRIAL DESIGN, METHODOLOGY AND METHOD**

54 This is a qualitative study using a convenience sample. The philosophy is to  
55 use a qualitative, constructivist, interpretive method to co-construct knowledge  
56 about the value of follow-up, since a person centred approach was not the  
57  
58  
59  
60

1  
2  
3 focus of previous studies assessing the value of stroke follow-up. It is  
4 intended that this study will provide valuable evidence to inform decisions  
5 about local stroke service development. This is particularly important as there  
6 has been limited service user engagement in service design previously.  
7  
8

9  
10 The study will use a convenience sampling method, since people affected by  
11 stroke will be approached in the clinic offered at the hospital. There will be no  
12 selection by the researchers; all those who attend will be offered the chance  
13 to take part regardless of age, ability or any other criteria other than those  
14 exclusion criteria listed. Carers or relatives of stroke survivors who could act  
15 as interpreters would be welcome to participate in the study with the  
16 individual.  
17  
18

19  
20 Potential participants will be approached at the end of their six month clinical  
21 follow-up appointment and invited to participate within the next two weeks.  
22 Written information about the study and a contact number will be given out if  
23 interest is initially expressed. Within the next week a researcher will make  
24 contact to invite formal enrolment, gain consent and arrange the interview  
25 date, time and venue. It is intended to hold interviews within two weeks of the  
26 clinic appointment. This will allow participants to prepare for the interview by  
27 making notes or reflecting on what they valued in the follow-up. The aim is to  
28 recruit up to 30 stroke survivors into the study.  
29  
30  
31

32  
33 A semi-structured interview will be conducted in the hospital or person's  
34 home, depending upon their choice. Interviews will last a maximum of one  
35 hour. As the interview style is semi-structured, the length of interview and  
36 depth of information proffered will be determined by the participant. This style  
37 of interview allows the participant to offer as much or little detail as they see  
38 fit, since the topic is likely to require some emotional investment from each  
39 individual. The emotional state and vulnerability of the individual will be  
40 considered, so interviews could be staged into short time sections in order not  
41 to tire the individual and to encourage the participant to feel they were needed  
42 and not 'being used'. The physical and psychological safety of the participant  
43 will be paramount. If a participant should disclose information which was of  
44 concern to the interviewer, the interviewer will follow the multi-agency  
45 safeguarding adults policy agreed by the local Adult Safeguarding Board.  
46  
47  
48  
49

50  
51 The interviews will be digitally recorded and transcribed, then stored on-line in  
52 a password-protected file only accessible by the researchers and one  
53 secretary. Transcriptions will be analysed using NVivo<sup>®</sup> software. The use of  
54 qualitative software will standardise analysis, resulting in broad themes which  
55 can be interpreted and illustrated using verbatim quotations.  
56  
57  
58  
59  
60

1  
2  
3 Narrative analysis will be used to code transcribed text to examine themes  
4 and key words from the raw data. Narrative analysis is an examination of  
5 individual stories that can contribute to an understanding of that individual's  
6 experience. In this case the 'stories' are the content of the interview, the lived  
7 and living experience of stroke as described by the stroke survivor in the  
8 context of an interview conversation. Narrative analysis, in which experiences  
9 are constructed from dialogic aspects of narrative<sup>9</sup>, can examine data from a  
10 literal or reflexive approach. Both will be used in this study; literal analysis will  
11 examine particular language, for example repeated words or phrases, and  
12 reflexive analysis will include the researchers' and participants' contribution to  
13 the co-creation of knowledge through the interpretation and reflection on  
14 content<sup>10</sup>. Verbatim quotes will be used to illustrate themes or recurrent  
15 points.  
16  
17  
18  
19

20  
21 All data will be anonymised and potential participants will be advised of this  
22 when giving informed consent. Participants will also be offered the opportunity  
23 to validate the transcription by checking a copy of the transcribed interview for  
24 accuracy. Transcriptions will be posted or emailed to the participant,  
25 whichever method they prefer, and the researcher practitioner's contact  
26 number and e-mail will be provided for them to call or e-mail with their  
27 comments. They will be advised that they are being asked to ensure that the  
28 transcription is an accurate record of their interview and to confirm again that  
29 they are happy for quotes to be used in the final report. This process of  
30 validation will give participants ownership of the data and further allow them to  
31 agree to its use. This collaborative approach will enable the co-construction of  
32 new knowledge between the researchers, and the participants as experts.  
33  
34  
35  
36

37 The full study is expected to last two years, with a focus group and pilot  
38 interviews taking place in the first year. Transcription, data analysis and report  
39 writing are anticipated to be completed in the second year.  
40  
41

## 42 **ELIGIBILITY**

### 43 Inclusion

- 44 ○ Those attending the six month follow-up clinic appointment.
- 45 ○ Adults over the age of 18.
- 46 ○ Able to give informed consent, or proxy consent from a relative.
- 47 ○ Individuals with aphasia may take part if they have a close relative  
48 who can help make their views understood through verbal or written  
49 means.  
50

### 51 Exclusion

- 52 ○ Those who had a stroke less than six months ago.
- 53 ○ Age less than 18.
- 54
- 55
- 56
- 57
- 58
- 59
- 60

- Those who do not speak English fluently and who do not have an interpreter who can translate for them.
- Non-stroke life expectancy of less than six months.
- Individuals with dementia whose memory is impaired to a degree that they could not give meaningful consent
- Individuals who do not have capacity to consent.

## RECRUITMENT

The trial uses an opportunistic sampling strategy. Potential participants will be approached at the end of their clinical follow-up by the Chief Investigator (who runs the clinic) and invited to participate within the next two weeks. Written information about the study and the contact number of the researcher will be given out if interest is initially expressed. Written information using text that has key words and concepts in bold<sup>11</sup> will be provided to those with dysphasia to enable them to express their own wishes about participation. Within the next week the researcher will make contact to invite formal enrolment, gain consent and arrange the interview date, time and venue. The researcher will not be present in the clinic interview.

## CONSENT

Informed, written consent will be sought for all participants. When initial interest is expressed, individuals will be given an information sheet and contact telephone numbers to take away with them. The researcher will gain written consent before the interview takes place. The participant will be given a copy of their signed consent form. Hard copies of consent forms will be stored securely at the study centre.

## DATA SOURCES AND MEASUREMENT

Raw data will be in the form of digital recordings of the interviews. These will be transcribed to enable analysis to be completed efficiently. Transcribed interviews will be identified by a numerical code unique to each individual. Transcriptions will be analysed using NVivo<sup>®</sup> software. In response to ethics committee recommendations, transcriptions will only be entered into the NVivo analysis software by Dr. Price, (*i.e.* before any analysis or coding takes place) since there is potential to bias the results if the researcher who runs the clinic (Dr. Jenkins) also sees the interview content. The transcriptions will have been checked by the participant for accuracy prior to analysis.

Coded 'chunks' of data will be analysed by both researchers and there will be an iterative process of reflection on content by both researchers. Literal and reflective narrative analysis will be used to code transcribed text to examine shared themes and key words, and reflect on the content of the interviews. Verbatim quotes will be used to illustrate themes or recurrent points.



## QUALITY ASSURANCE

The Chief Investigator and Co-Investigator have valid Good Clinical Practice certificates and are experienced researchers. The scientific quality of the study has been assessed by independent peer review of the proposal by a university lecturer, via the West Midlands South Comprehensive Local Research Network Research and Development team. It has also been scrutinised by the Trust, acting as sponsor. In addition, this proposal has been reviewed by the Research and Development team and the Research Design Service at study preparation and prior to commencement.

Finally, the proposal has also been considered by a member of the stroke team who is not involved in the research but who has extensive knowledge of stroke and experience of working with patients in a person-centred way.

## CONFIDENTIALITY

Digital interview recordings, written transcriptions and written analysis will be kept in a file on a password protected secure NHS network drive. Access to this file will be restricted to both named researchers and one member of secretarial staff. All data will be anonymised and potential participants will be advised of this as part of the consent process. Hard copies of consent forms will be kept in a locked filing cabinet in a locked office.

## ACCRUAL AND ANALYSIS

Sample size up to 30

The minimum recruitment is set at 12 to enable recruitment of one person a month, though it is expected that this will be exceeded. The maximum is calculated on the basis that saturation point will be reached, whereby no further new information will be gained by interviewing more participants. The data provided in interview will be rich and deep, so a relatively small sample size is justified.

## ANALYSIS METHODS

A narrative style of analysis will be used to examine shared themes and commonality in the interview transcriptions. NVivo<sup>®</sup> software will be used to standardise the analysis. Narrative analysis centres on the structured study of stories or oral narrative accounts of complex and nuanced experience, in this case taking the form of interview responses. Individual interview stories can be categorised and analysed by themes within the account (thematic analysis) or by the way the interview conversation is structured; for example examining the use of metaphor would result in a structural analysis of the narrative. It is anticipated that both types of analysis will be used in this study.

There is the potential for the Chief Investigator to be biased against any negative narratives arising from interviews since it is his clinic under scrutiny.

1  
2  
3 In order to mitigate this possibility, raw data will be entered into the NVivo<sup>®</sup>  
4 qualitative software package by Dr. Price, removing the need for the Chief  
5 Investigator to examine raw data. Analysis of coded, processed data will then  
6 be undertaken by both researchers in order to answer the research question.  
7  
8

### 9 10 **LONG-TERM STORAGE OF DATA**

11 Digital voice recordings of interviews, transcribed interviews and analysed  
12 data will be kept for five years after publication, and then destroyed. The  
13 rationale for keeping data for this length of time is to allow sufficient time for  
14 publication of the research in a peer-reviewed journal and subsequent  
15 academic review.  
16  
17

### 18 19 **PATIENT AND PUBLIC INVOLVEMENT**

20 The National Clinical Guidelines for Stroke<sup>1</sup> advise that the views of stroke  
21 patients and their carers should be considered when evaluating a service, and  
22 this study aims to answer that call.  
23  
24

25 A focus group of six stroke survivors and their carers will be invited to discuss  
26 the study and proposed method to ensure that the approach is appropriate  
27 and robust. The focus group discussion will also be used to devise and  
28 validate the interview questions, to ensure that attention is paid to the views  
29 and feelings of stroke survivors. Members of the focus group will consist of  
30 individuals who will not have attended a recent follow-up appointment so they  
31 will be able to approach the study from an independent viewpoint. Group  
32 members will be asked for their permission to have the discussion recorded.  
33 The content and feedback from this discussion will enable the focus of the  
34 resulting research questions to be precisely based on the views of patients  
35 and carers, thereby ensuring that this study has its genesis in the participant  
36 experience, not the researcher's interpretation of what that experience may  
37 be.  
38  
39  
40  
41  
42

43 Four stroke survivors who did not take part in the focus group will be recruited  
44 from the follow-up clinic to take part in a one-to-one pilot interview to ascertain  
45 the feasibility of the study method. Again, feedback will be sought from the  
46 pilot interviewees on the questions and the way the study was run, and final  
47 amendments to the full study will be made accordingly.  
48  
49

50 Participants in both the pilot and main study will be offered the opportunity to  
51 validate the transcription by checking a copy of their interview for accuracy.  
52 This will give participants ownership of the data and further allow them to  
53 agree to its use. Participants will also be given a copy of the final report, to  
54 see the results of their involvement.  
55  
56  
57  
58  
59  
60

## ETHICAL CONSIDERATIONS

The study proposal has been reviewed by the West Midlands South Comprehensive Local Research Network, and been peer reviewed by an independent university lecturer who acted as a reviewer.

All study documentation has been reviewed by the Coventry and Warwickshire Research Ethics Committee and the chief investigator met with the committee to scrutinise the study and justify its methodology. The committee has approved this study.

Risk of breach of confidentiality will be minimised by the use of anonymised data. Participants will be asked to consent to direct quotations from interview being used in the final report, in the knowledge that they will not be named or their identity be inferred.

There is a minimal risk that people might become upset while talking about their experiences of stroke; Dr. Price is an experienced interviewer and will support people appropriately using active listening skills. People will not have to answer any questions they find uncomfortable and can withdraw at any time in the study; this will be made clear in the consent process.

In the event of an individual becoming distressed, they will be asked if they wish to delay or discontinue the interview, and Dr. Price will ensure that someone is with the participant once the interview is completed. The interviewer will also be equipped to provide the participant with details of support organisations or help-lines should the need arise.

## ANTICIPATED PROBLEMS

There might be a bias caused by the participant receiving additional attention by taking part in the interview; they might over-value the clinic appointment because additional attention has been paid to them and they place value on that process. Participants will be reminded that the focus of the study is the value of the clinic appointment, so as not to confound the results.

Individuals may be reluctant to offer negative views about the clinic if they are aware that those views will be fed back to the consultant. It will be made clear in the informed consent process that i) data will not be attributable to them by name, ii) the consultant will not analyse raw data but will only examine the resulting themes, and iii) Dr. Price is not employed by the Trust and so she can offer an objective analysis of the results.

## POTENTIAL BENEFIT TO RESEARCH PARTICIPANTS

For some individuals, participation may allow further opportunity to reflect on their development since their stroke or to take part in a worthwhile endeavour

1  
2  
3 which could benefit others. In other words, participation may be beneficial  
4 since it enables them to have some influence or a role.  
5  
6

### 7 **EXPECTED OUTCOMES OF THE STUDY**

8 The study will inform the development of local stroke services in an area that  
9 has hitherto had little resource or clinical attention. The study will inform  
10 commissioners of the benefits to people affected by stroke of follow-up by  
11 stroke clinicians. The study will also enhance the theoretical basis for stroke  
12 follow-up. The study might show that there is no benefit to six month follow-up  
13 in its current SSNAP-based format but may suggest alternative approaches or  
14 timing of follow-up.  
15  
16

### 17 **DISSEMINATION OF RESULTS AND PUBLICATION POLICY**

18 A copy of the final study report will be given to the participants, participants'  
19 GP's, the Stroke Association and the local Clinical Commissioning Group. It is  
20 further intended to disseminate the results by presentation at academic  
21 conferences and by publication in a peer-reviewed scientific journal.  
22  
23  
24

### 25 **TIMETABLE**

26 The timetable is sub-divided into a pre-study set-up period, and the pilot and  
27 main study. Chart 1 shows the anticipated timing to gain approvals, run the  
28 focus group and amend the study based on focus group feedback.  
29  
30  
31  
32

#### 33 **Chart 1: Pre-Study Timetable**

34 *Chart 1 here*  
35  
36  
37  
38  
39  
40  
41

#### 42 **Chart 2: Study Timetable**

43 *Chart 2 here*  
44  
45  
46

47 Chart 2 shows the estimated timetable for the study, commencing May 2014  
48 and anticipated to end in May 2016. Both investigators expect to be in post for  
49 the duration of the study.  
50  
51  
52

### 53 **BUDGET SUMMARY**

54 Table 1 below shows the breakdown of the budget for the two years of the  
55 study.  
56  
57  
58  
59  
60

**Table 1**

|                                                                                                               | Year 1 (£)    | Year 2 (£)    | Total         |
|---------------------------------------------------------------------------------------------------------------|---------------|---------------|---------------|
| Salaries (typing costs at £1.50 per minute)*                                                                  | £1350*        | £1350*        | £1700         |
| Equipment (External computer hard drive and Digital encrypted Dictaphone)                                     | £390          | -             | £390          |
| Consumables (NVivo® software)                                                                                 | £835          | -             | £835          |
| Travel (Researcher to patient homes, and participants to venue plus parking costs)                            | £400          | -             | £400          |
| Other expenses<br>(Printing information and consent forms;<br>Postage; Literature: printing and access costs) | £400          | -             | £400          |
| <b>Total</b>                                                                                                  | <b>£3,375</b> | <b>£1,350</b> | <b>£4,725</b> |

\*The salary budget is designed to be used to pay one member of secretarial staff to transcribe interviews, and the typing cost is set to reflect the fact that transcription is in addition to their usual duties.

The budget is largely for initial capital costs to enable the study to be set up.

### TEAM EXPERTISE

The Chief Investigator (CI) has experience of acting as Principal Investigator for seven clinical stroke trials and has undertaken independent qualitative research in the past. The Co-Investigator has successfully completed independent doctoral level qualitative study. Her post is funded by the NIHR Clinical Research Network. Both researchers hold current Good Clinical Practice certificates. In addition, both researchers have a person-centred focus and are motivated to gain the personal histories of people affected by stroke in order to inform service provision.

### **Acknowledgements**

We are very grateful to The Eveson Charitable Trust and The James Tudor Foundation for funding this study. Thanks also to Dr. Karima Kadi-Hanifi and the anonymous reviewers for their suggestions. Finally, we acknowledge the contribution of Ciara Harris – without her word-play skills this study would have no name!

### **FUNDING BODIES**

The study has been funded by two local charities, The Eveson Charitable Trust and The James Tudor Foundation.

### **CONTRIBUTORSHIP**

Dr. Colin Jenkins originally conceived the idea for the study and has made a substantial contribution to the design and methodology of the research protocol. He has reviewed the protocol content, researched the background to the issue and collaborated in the writing of the full document.

Dr. Fiona Price has drafted and revised the written protocol based on scrutiny by independent academic colleagues. She has also used her expertise in qualitative research design to devise a structured method for the research.

## REFERENCES

- 1 Department of Health (2012) The National Clinical Guidelines for Stroke  
HMSO: London
- 2 Royal College of Physicians (2013) Sentinel Stroke National Audit  
Programme Retrieved from: <https://www.strokeaudit.org/> Accessed  
19<sup>th</sup> June 2013
- 3 Duncan PW, Sullivan KJ, Behrman AL, Azen SP, Wu SS, Nadeau  
SE, Dobkin BH, Rose DK, Julie K, Tilson JK, Cen S and Hayden SK  
Body-Weight-Supported Treadmill Rehabilitation after Stroke. *The  
New England Journal of Medicine* 2011; 364:2026-2036
- 4 Ferrarello F, Baccini M, Rinaldi LA, Cavallini MC, Mossello E,  
Masotti G, Marchionni N and Di Bari M Efficacy of  
physiotherapy interventions late after stroke: a meta-analysis *Journal  
of Neurology, Neurosurgery and Psychiatry* 2011;82: 136-143
- 5 Forster A, Young J, Green J, Patterson C, Wanklyn P, Smith J,  
Murray J, Wild H, Bogle S and Lawson K Structured re-assessment  
system at 6 months after a disabling stroke: a randomised controlled  
trial with resource use and cost study *Age and Ageing* 2009; 38: 576–  
583
- 6 Stroke Association (2013) Feeling Overwhelmed: the emotional impact of  
stroke Retrieved from:  
<http://www.stroke.org.uk/involved/feeling-overwhelmed-report>  
Accessed 19th June 2013
- 7 Comprehensive Local Research Network conference (2013) Celebrating  
Achievements and Planning for the Future 1<sup>st</sup> July 2013, Stratford  
Manor Hotel, Stratford-upon-Avon
- 8 McKeivitt C, Fudge N, Refern J, Sheldenkar A, Crichton S and Wolfe  
C UK stroke survivors needs survey London: *Stroke  
Association and Kings College London* 2011
- 9 Riessman CK Narrative Methods for the Human Sciences. 2008 Los  
Angeles, CA: Sage
- 10 Welsh E Dealing with Data: using NVivo in the Qualitative Data  
Analysis Process. *Forum: Quantitative Social Research* 2002; 3: (2),  
Art. 26
- 11 Dalemans R, Wade DT, van den Heuvel WJA and de Witte LP Facilitating  
the participation of people with aphasia in research: a description of  
strategies: *Clinical Rehabilitation* 2009; 23: (10), 948-959

**VOICES: the Value Of six-month Clinical Evaluation in Stroke - A qualitative study to ascertain the value of stroke follow-up to people affected by stroke**

Jenkins and Price

**Chart 1: Pre-Study Timetable**

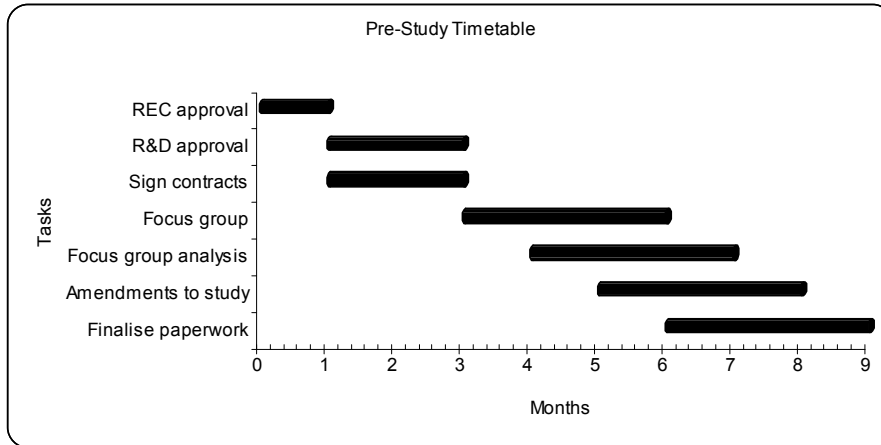

**Chart 2: Study Timetable**

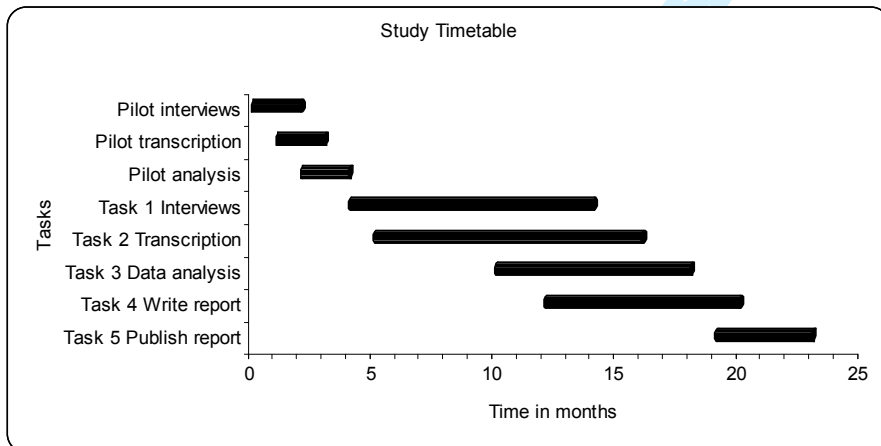



1  
2  
3  
4  
5  
6 **VOICES: the Value Of six-month Clinical Evaluation in Stroke – The protocol**  
7 **for a planned qualitative study to ascertain the value of stroke follow-up to**  
8 **people affected by stroke**  
9

**Comment [PF1]:** Changed from 'A qualitative study'.  
Added in response to editorial comment 1 to clarify that this is a protocol

10 Protocol Version 1.4 Dated 8<sup>th</sup> April 2014  
11  
12  
13

14  
15  
16 **Chief Investigator**

17 Dr. Colin Jenkins  
18 Consultant Physician, Geriatric Medicine and Stroke Services Herefordshire  
19 NHS  
20 Wye Valley NHS Trust  
21 The County Hospital  
22 Union Walk  
23 Hereford HR1 2ER  
24 United Kingdom  
25 01432 355444 Ext. 5482  
26 [colin.jenkins@wvt.nhs.uk](mailto:colin.jenkins@wvt.nhs.uk)  
27  
28

29  
30 **Co-Investigator**

31 Dr. Fiona Price  
32 Stroke Research Practitioner  
33 Stroke Team Office  
34 Wye Valley NHS Trust  
35 The County Hospital  
36 Union Walk  
37 Hereford HR1 2ER  
38 United Kingdom  
39 01432 355444 Ext. 5454 or 2955  
40 07584 952501  
41 [fiona.price@wvt.nhs.uk](mailto:fiona.price@wvt.nhs.uk)  
42  
43  
44

45 Key words: Stroke, Follow-up, Value, Carers, Review  
46  
47

48 Word count: 3789  
49  
50  
51  
52  
53  
54  
55  
56  
57  
58  
59  
60

**Comment [PF2]:** Word count has been amended following changes to the document

## ABSTRACT

### Introduction

The National Clinical Guidelines for Stroke recommend 'routine follow-up of patients six months post discharge'. The Sentinel Stroke National Audit Programme sets a standard of six months post admission follow-up, capturing data on process and outcomes.

There appears to be no convincing model of stroke follow-up at six months, and despite evidence of unmet need in almost 50% of stroke survivors one to five years after their stroke, little work focuses on the first twelve months of recovery.

By listening to the living experiences of stroke, the research aims to tailor the stroke care pathway to the needs of those affected.

### Methods and analysis

A focus group of six stroke survivors and carers will be invited to identify appropriate interview questions about the value of follow-up at six months, ensuring that this study has its genesis in the participant experience.

A pilot study of four stroke survivors will ascertain the feasibility of the method. 30 stroke survivors from the follow-up clinic will be invited to take part in semi-structured interviews. Raw data, in the form of digital recordings of the interviews, will be transcribed. Interview transcriptions will be checked by the participant for accuracy prior to analysis using NVivo<sup>®</sup> software. Literal and reflective narrative analysis will be used to code transcribed text to examine shared themes and reflect on content.

### Ethics and dissemination

Study documentation has been reviewed by the Coventry and Warwickshire Research Ethics Committee; the chief investigator met with the committee to scrutinise the study and justify its methodology. The committee has approved this study.

A copy of the final report will be given to participants, the Stroke Association, the local Clinical Commissioning Group and participants' GP's. It is intended to disseminate the results locally by presentation to the Trust board, at academic conferences and by publication in a peer-reviewed scientific journal.

## STRENGTHS AND LIMITATIONS

### Strengths –

- patient and carer involvement – interview questions arise from stroke survivors, not from the researcher's assumption
- detailed, holistic data
- lived and living, active histories

### Limitations –

- geographically specific, but may be generalisable to others in similar locations
- relatively small sample size, but close to 30 hours of data is broad and deep, and should providing vivid, compelling accounts
- subjectivity of qualitative style is inevitable & acknowledged

## BACKGROUND AND RATIONALE

The National Clinical Guidelines for Stroke recommend 'routine follow-up of patients six months post discharge and annually after a stroke' and 'any patient with residual impairment after the end of initial rehabilitation should be offered a formal review at least every six months, to consider whether further interventions are warranted'. These recommendations are a consensus view of the expert working party<sup>2</sup>.

The Sentinel Stroke National Audit Programme (SSNAP) sets a standard of six months post admission follow-up assessment ( $\pm 2$  months): this captures data on process and some outcomes<sup>3</sup>.

There appears to be no convincing theoretical model of stroke follow-up at six months; there is also a notable discrepancy between six months post admission and six months post discharge recommended by SSNAP and the National Clinical Guidelines for Stroke respectively. Two studies suggest that some patients will benefit from physiotherapy<sup>4,5</sup>. Forster *et al.* however found no evidence for a structured reassessment at six months in terms of resource usage<sup>6</sup>.

Some person-centred qualitative evidence is available from the Stroke Association survey 'Feeling Overwhelmed: the emotional impact of stroke' of 2700 people affected by stroke<sup>1</sup>. This research examined the emotional impact of stroke on survivors, their carers and families and highlighted the need for further research into what they describe as an 'underappreciated problem'<sup>1</sup>. Finally, Martin Gower highlighted the need to focus on service user and carer involvement in helping to shape the stroke care agenda in the

**Comment [PF3]:** Lay summary has been removed from here in response to comment 2

1  
2  
3  
4  
5  
6 Comprehensive Local Research Network (CLRN) 'Celebrating Achievements'  
7 conference<sup>7</sup>.  
8

### 9 **PATIENT BENEFIT**

10 There is evidence of unmet need in almost 50% of stroke survivors between  
11 one and five years after the stroke<sup>8</sup> though little work focuses on the first  
12 twelve months of recovery. Our six month consultant-led follow-up clinic  
13 currently examines the needs of local patients and their carers.  
14  
15

16 This study aims to provide patient benefit by having a positive impact on the  
17 short to medium term holistic physical and psychological well-being of the  
18 patient and their carers. By ascertaining the value of follow-up intervention  
19 from the stroke survivor's perspective, we aim to provide a beneficial service  
20 tailored to the needs of individuals. The provision of a follow-up service at six  
21 months has been timed according to the National Clinical Guidelines for  
22 Stroke<sup>2</sup>, but there is no clear evidence to show why six months has been  
23 chosen as an appropriate time. This study will ascertain the value of the  
24 follow-up directly from the living experiences of the stroke survivors and  
25 carers as experts, and could lead to evidence for follow-up at a different time.  
26 Results from this study could be incorporated into the National Clinical  
27 Guidelines for Stroke and ultimately achieve benefit for all users of stroke  
28 services within the NHS.  
29  
30  
31

### 32 **OBJECTIVES**

33 Principle objectives:

- 34 ○ What is the value to people affected by stroke of a six month follow-up  
35 clinic?  
36
- 37 ○ Is six months post stroke the best time?  
38

39 Secondary objectives:

- 40 ○ The study will systematically review previous research in this area and  
41 seek to fill the specific gap in knowledge about the value of follow-up.  
42
- 43 ○ The study will follow a given methodology, a patient-centred,  
44 constructivist qualitative philosophy, in order to collect robust data.  
45
- 46 ○ The term 'value' will be examined to determine how it is perceived and  
47 interpreted by stroke survivors.  
48
- 49 ○ Data will be examined using narrative analysis to gain the lived and  
50 living experience of stroke survivors.  
51
- 52 ○ Results will inform local stroke provision.  
53

### 54 **TRIAL DESIGN, METHODOLOGY AND METHOD**

55 This is a qualitative study using a convenience sample. The philosophy is to  
56 use a qualitative, constructivist, interpretive method to co-construct knowledge  
57 about the value of follow-up, since a person centred approach was not the  
58  
59  
60

1  
2  
3  
4  
5  
6 focus of previous studies assessing the value of stroke follow-up. It is  
7 intended that this study will provide valuable evidence to inform decisions  
8 about local stroke service development. This is particularly important as there  
9 has been limited service user engagement in service design previously.  
10

11  
12 The study will use a convenience sampling method, since people affected by  
13 stroke will be approached in the clinic offered at the hospital. There will be no  
14 selection by the researchers; all those who attend will be offered the chance  
15 to take part regardless of age, ability or any other criteria other than those  
16 exclusion criteria listed. Carers or relatives of stroke survivors who could act  
17 as interpreters would be welcome to participate in the study with the  
18 individual.  
19

20  
21 Potential participants will be approached at the end of their six month clinical  
22 follow-up appointment and invited to participate within the next two weeks.  
23 Written information about the study and a contact number will be given out if  
24 interest is initially expressed. Within the next week a researcher will make  
25 contact to invite formal enrolment, gain consent and arrange the interview  
26 date, time and venue. It is intended to hold interviews within two weeks of the  
27 clinic appointment. This will allow participants to prepare for the interview by  
28 making notes or reflecting on what they valued in the follow-up. The aim is to  
29 recruit up to 30 stroke survivors into the study.  
30  
31

32 A semi-structured interview will be conducted in the hospital or person's  
33 home, depending upon their choice. Interviews will last a maximum of one  
34 hour. As the interview style is semi-structured, the length of interview and  
35 depth of information proffered will be determined by the participant. This style  
36 of interview allows the participant to offer as much or little detail as they see  
37 fit, since the topic is likely to require some emotional investment from each  
38 individual. The emotional state and vulnerability of the individual will be  
39 considered, so interviews could be staged into short time sections in order not  
40 to tire the individual and to encourage the participant to feel they were needed  
41 and not 'being used'. The physical and psychological safety of the participant  
42 will be paramount. If a participant should disclose information which was of  
43 concern to the interviewer, the interviewer will follow the multi-agency  
44 safeguarding adults policy agreed by the local Adult Safeguarding Board.  
45  
46  
47

48 The interviews will be digitally recorded and transcribed, then stored on-line in  
49 a password-protected file only accessible by the researchers and one  
50 secretary. Transcriptions will be analysed using NVivo<sup>®</sup> software. The use of  
51 qualitative software will standardise analysis, resulting in broad themes which  
52 can be interpreted and illustrated using verbatim quotations.  
53  
54  
55  
56  
57  
58  
59  
60

1  
2  
3  
4  
5  
6 Narrative analysis will be used to code transcribed text to examine themes  
7 and key words from the raw data. Narrative analysis is an examination of  
8 individual stories that can contribute to an understanding of that individual's  
9 experience. In this case the 'stories' are the content of the interview, the lived  
10 and living experience of stroke as described by the stroke survivor in the  
11 context of an interview conversation. Narrative analysis, in which experiences  
12 are constructed from dialogic aspects of narrative<sup>9</sup>, can examine data from a  
13 literal or reflexive approach. Both will be used in this study; literal analysis will  
14 examine particular language, for example repeated words or phrases, and  
15 reflexive analysis will include the researchers' and participants' contribution to  
16 the co-creation of knowledge through the interpretation and reflection on  
17 content<sup>10</sup>. Verbatim quotes will be used to illustrate themes or recurrent  
18 points.  
19  
20

21  
22 All data will be anonymised and potential participants will be advised of this  
23 when giving informed consent. Participants will also be offered the opportunity  
24 to validate the transcription by checking a copy of the transcribed interview for  
25 accuracy. Transcriptions will be posted or emailed to the participant,  
26 whichever method they prefer, and the researcher practitioner's contact  
27 number and e-mail will be provided for them to call or e-mail with their  
28 comments. They will be advised that they are being asked to ensure that the  
29 transcription is an accurate record of their interview and to confirm again that  
30 they are happy for quotes to be used in the final report. This process of  
31 validation will give participants ownership of the data and further allow them to  
32 agree to its use. This collaborative approach will enable the co-construction of  
33 new knowledge between the researchers, and the participants as experts.  
34  
35

36  
37 The full study is expected to last two years, with a focus group and pilot  
38 interviews taking place in the first year. Transcription, data analysis and report  
39 writing are anticipated to be completed in the second year.  
40

## 41 **ELIGIBILITY**

### 42 Inclusion

- 43 ○ Those attending the six month follow-up clinic appointment.
- 44 ○ Adults over the age of 18.
- 45 ○ Able to give informed consent, or proxy consent from a relative.
- 46 ○ Individuals with aphasia may take part if they have a close relative  
47 who can help make their views understood through verbal or written  
48 means.  
49

### 50 Exclusion

- 51 ○ Those who had a stroke less than six months ago.
- 52 ○ Age less than 18.

- Those who do not speak English fluently and who do not have an interpreter who can translate for them.
- Non-stroke life expectancy of less than six months.
- Individuals with dementia whose memory is impaired to a degree that they could not give meaningful consent
- Individuals who do not have capacity to consent.

## RECRUITMENT

The trial uses an opportunistic sampling strategy. Potential participants will be approached at the end of their clinical follow-up by the Chief Investigator (who runs the clinic) and invited to participate within the next two weeks. Written information about the study and the contact number of the researcher will be given out if interest is initially expressed. **Written information using text that has key words and concepts in bold<sup>11</sup> will be provided to those with dysphasia to enable them to express their own wishes about participation.** Within the next week the researcher will make contact to invite formal enrolment, gain consent and arrange the interview date, time and venue. The researcher will not be present in the clinic interview.

## CONSENT

Informed, written consent will be sought for all participants. When initial interest is expressed, individuals will be given an information sheet and contact telephone numbers to take away with them. The researcher will gain written consent before the interview takes place. The participant will be given a copy of their signed consent form. Hard copies of consent forms will be stored securely at the study centre.

## DATA SOURCES AND MEASUREMENT

Raw data will be in the form of digital recordings of the interviews. These will be transcribed to enable analysis to be completed efficiently. Transcribed interviews will be identified by a numerical code unique to each individual. Transcriptions will be analysed using NVivo<sup>®</sup> software. **In response to ethics committee recommendations, transcriptions will only be entered into the NVivo analysis software by Dr. Price, (i.e. before any analysis or coding takes place)** since there is potential to bias the results if the researcher who runs the clinic (Dr. Jenkins) also sees the interview content. The transcriptions will have been checked by the participant for accuracy prior to analysis.

**Coded 'chunks' of data** will be analysed by both researchers and there will be an iterative process of reflection on content by both researchers. Literal and reflective narrative analysis will be used to code transcribed text to examine shared themes and key words, and reflect on the content of the interviews. Verbatim quotes will be used to illustrate themes or recurrent points.

**Comment [PF4]:** This sentence has been added in response to the comment 'The inclusion of stroke survivors with aphasia is welcome, but could be better addressed by designing aphasia-friendly study materials (e.g. information and consent forms, modified interview schedule) rather than relying on the interpretation of a relative or friend.' The study documentation mentioned here will enable the participation of people with aphasia

**Comment [PF5]:** In response to the reviewer comment 'It appears that initial coding will be performed only by one researcher (FP).' The wording has been changed from 'only read by Dr. Price'. The ethics committee recommended that the chief investigator (who runs the clinic) should not see the full transcription prior to analysis of coded sections of that data. This paragraph indicates that FP will enter raw data into NVivo, and then both researchers will examine the resulting output. This point is re-iterated at the top of page 9

**Comment [PF6]:** Changed from 'coded data' to show that the researchers will be analysing specific parts of the overall transcription, i.e. the 'chunks' highlighted by the software package.

## QUALITY ASSURANCE

The Chief Investigator and Co-Investigator have valid Good Clinical Practice certificates and are experienced researchers. The scientific quality of the study has been assessed by independent peer review of the proposal by a university lecturer, via the West Midlands South Comprehensive Local Research Network Research and Development team. It has also been scrutinised by the Trust, acting as sponsor. In addition, this proposal has been reviewed by the Research and Development team and the Research Design Service at study preparation and prior to commencement.

Finally, the proposal has also been considered by a member of the stroke team who is not involved in the research but who has extensive knowledge of stroke and experience of working with patients in a person-centred way.

## CONFIDENTIALITY

Digital interview recordings, written transcriptions and written analysis will be kept in a file on a password protected secure NHS network drive. Access to this file will be restricted to both named researchers and one member of secretarial staff. All data will be anonymised and potential participants will be advised of this as part of the consent process. Hard copies of consent forms will be kept in a locked filing cabinet in a locked office.

## ACCRUAL AND ANALYSIS

Sample size up to 30

The minimum recruitment is set at 12 to enable recruitment of one person a month, though it is expected that this will be exceeded. The maximum is calculated on the basis that saturation point will be reached, whereby no further new information will be gained by interviewing more participants. The data provided in interview will be rich and deep, so a relatively small sample size is justified.

## ANALYSIS METHODS

A narrative style of analysis will be used to examine shared themes and commonality in the interview transcriptions. NVivo<sup>®</sup> software will be used to standardise the analysis. Narrative analysis centres on the structured study of stories or oral narrative accounts of complex and nuanced experience, in this case taking the form of interview responses. Individual interview stories can be categorised and analysed by themes within the account (thematic analysis) or by the way the interview conversation is structured; for example examining the use of metaphor would result in a structural analysis of the narrative. It is anticipated that both types of analysis will be used in this study.



1  
2  
3  
4  
5  
6  
7  
8  
9  
10  
11  
12  
13  
14  
There is the potential for the Chief Investigator to be biased against any negative narratives arising from interviews since it is his clinic under scrutiny. In order to mitigate this possibility, raw data will be entered into the NVivo<sup>®</sup> qualitative software package by Dr. Price, removing the need for the Chief Investigator to examine raw data. Analysis of coded, processed data will then be undertaken by both researchers in order to answer the research question.

### 15 16 17 18 19 20 21 22 **LONG-TERM STORAGE OF DATA**

Digital voice recordings of interviews, transcribed interviews and analysed data will be kept for five years after publication, and then destroyed. The rationale for keeping data for this length of time is to allow sufficient time for publication of the research in a peer-reviewed journal and subsequent academic review.

### 23 24 25 26 27 28 **PATIENT AND PUBLIC INVOLVEMENT**

The National Clinical Guidelines for Stroke<sup>2</sup> advise that the views of stroke patients and their carers should be considered when evaluating a service, and this study aims to answer that call.

29  
30  
31  
32  
33  
34  
35  
36  
37  
38  
39  
40  
41  
42  
43  
44  
A focus group of six stroke survivors and their carers will be invited to discuss the study and proposed method to ensure that the approach is appropriate and robust. The focus group discussion will also be used to devise and validate the interview questions, to ensure that attention is paid to the views and feelings of stroke survivors. Members of the focus group will consist of individuals who will not have attended a recent follow-up appointment so they will be able to approach the study from an independent viewpoint. Group members will be asked for their permission to have the discussion recorded. The content and feedback from this discussion will enable the focus of the resulting research questions to be precisely based on the views of patients and carers, thereby ensuring that this study has its genesis in the participant experience, not the researcher's interpretation of what that experience may be.

45  
46  
47  
48  
49  
50  
Four stroke survivors who did not take part in the focus group will be recruited from the follow-up clinic to take part in a one-to-one pilot interview to ascertain the feasibility of the study method. Again, feedback will be sought from the pilot interviewees on the questions and the way the study was run, and final amendments to the full study will be made accordingly.

51  
52  
53  
54  
55  
56  
57  
58  
59  
60  
Participants in both the pilot and main study will be offered the opportunity to validate the transcription by checking a copy of their interview for accuracy. This will give participants ownership of the data and further allow them to

1  
2  
3  
4  
5  
6 agree to its use. Participants will also be given a copy of the final report, to  
7 see the results of their involvement.  
8

### 9 10 **ETHICAL CONSIDERATIONS**

11 The study proposal has been reviewed by the West Midlands South  
12 Comprehensive Local Research Network, and been peer reviewed by an  
13 independent university lecturer who acted as a reviewer.  
14

15 All study documentation has been reviewed by the Coventry and  
16 Warwickshire Research Ethics Committee and the chief investigator met with  
17 the committee to scrutinise the study and justify its methodology. The  
18 committee has approved this study.  
19

20 Risk of breach of confidentiality will be minimised by the use of anonymised  
21 data. Participants will be asked to consent to direct quotations from interview  
22 being used in the final report, in the knowledge that they will not be named or  
23 their identity be inferred.  
24  
25

26 There is a minimal risk that people might become upset while talking about  
27 their experiences of stroke; Dr. Price is an experienced interviewer and will  
28 support people appropriately using active listening skills. People will not have  
29 to answer any questions they find uncomfortable and can withdraw at any  
30 time in the study; this will be made clear in the consent process.  
31 In the event of an individual becoming distressed, they will be asked if they  
32 wish to delay or discontinue the interview, and Dr. Price will ensure that  
33 someone is with the participant once the interview is completed. The  
34 interviewer will also be equipped to provide the participant with details of  
35 support organisations or help-lines should the need arise.  
36  
37  
38

### 39 **ANTICIPATED PROBLEMS**

40 There might be a bias caused by the participant receiving additional attention  
41 by taking part in the interview; they might over-value the clinic appointment  
42 because additional attention has been paid to them and they place value on  
43 that process. Participants will be reminded that the focus of the study is the  
44 value of the clinic appointment, so as not to confound the results.  
45  
46

47 Individuals may be reluctant to offer negative views about the clinic if they are  
48 aware that those views will be fed back to the consultant. It will be made clear  
49 in the informed consent process that i) data will not be attributable to them by  
50 name, ii) the consultant will not analyse raw data but will only examine the  
51 resulting themes, and iii) Dr. Price is not employed by the Trust and so she  
52 can offer an objective analysis of the results.  
53  
54

### 55 **POTENTIAL BENEFIT TO RESEARCH PARTICIPANTS**

1  
2  
3  
4  
5  
6 For some individuals, participation may allow further opportunity to reflect on  
7 their development since their stroke or to take part in a worthwhile endeavour  
8 which could benefit others. In other words, participation may be beneficial  
9 since it enables them to have some influence or a role.  
10

### 11 **EXPECTED OUTCOMES OF THE STUDY**

12 The study will inform the development of local stroke services in an area that  
13 has hitherto had little resource or clinical attention. The study will inform  
14 commissioners of the benefits to people affected by stroke of follow-up by  
15 stroke clinicians. The study will also enhance the theoretical basis for stroke  
16 follow-up. The study might show that there is no benefit to six month follow-up  
17 in its current SSNAP-based format but may suggest alternative approaches or  
18 timing of follow-up.  
19  
20

### 21 **DISSEMINATION OF RESULTS AND PUBLICATION POLICY**

22 A copy of the final study report will be given to the participants, participants'  
23 GP's, the Stroke Association and the local Clinical Commissioning Group. It is  
24 further intended to disseminate the results by presentation at academic  
25 conferences and by publication in a peer-reviewed scientific journal.  
26  
27

### 28 **TIMETABLE**

29 The timetable is sub-divided into a pre-study set-up period, and the pilot and  
30 main study. Chart 1 shows the anticipated timing to gain approvals, run the  
31 focus group and amend the study based on focus group feedback.  
32  
33

#### 34 **Chart 1: Pre-Study Timetable**

35 *Chart 1 here*  
36

37 Chart 2 shows the estimated timetable for the study, commencing May 2014  
38 and anticipated to end in May 2016. Both investigators expect to be in post for  
39 the duration of the study.  
40

#### 41 **Chart 2: Study Timetable**

42 *Chart 2 here*  
43  
44  
45  
46  
47  
48  
49  
50  
51  
52  
53  
54  
55  
56  
57  
58  
59  
60

## BUDGET SUMMARY

Table 1 below shows the breakdown of the budget for the two years of the study.

Comment [PF7]: Added to clarify table content

**Table 1**

|                                                                                                               | Year 1 (£)    | Year 2 (£)    | Total         |
|---------------------------------------------------------------------------------------------------------------|---------------|---------------|---------------|
| Salaries (typing costs at £1.50 per minute)*                                                                  | £1350*        | £1350*        | £1700         |
| Equipment (External computer hard drive and Digital encrypted Dictaphone)                                     | £390          | -             | £390          |
| Consumables (NVivo® software)                                                                                 | £835          | -             | £835          |
| Travel (Researcher to patient homes, and participants to venue plus parking costs)                            | £400          | -             | £400          |
| Other expenses<br>(Printing information and consent forms;<br>Postage; Literature: printing and access costs) | £400          | -             | £400          |
| <b>Total</b>                                                                                                  | <b>£3,375</b> | <b>£1,350</b> | <b>£4,725</b> |

\*The salary budget is designed to be used to pay one member of secretarial staff to transcribe interviews, and the typing cost is set to reflect the fact that transcription is in addition to their usual duties.

The budget is largely for initial capital costs to enable the study to be set up.

## TEAM EXPERTISE

The Chief Investigator (CI) has experience of acting as Principal Investigator for seven clinical stroke trials and has undertaken independent qualitative research in the past. The Co-Investigator has successfully completed independent doctoral level qualitative study. Her post is funded by the NIHR Clinical Research Network. Both researchers hold current Good Clinical Practice certificates. In addition, both researchers have a person-centred focus and are motivated to gain the personal histories of people affected by stroke in order to inform service provision.

## Acknowledgements

We are very grateful to The Eveson Charitable Trust and The James Tudor Foundation for funding this study. Thanks also to Dr. Karima Kadi-Hanifi and the anonymous reviewers for their suggestions. Finally, we acknowledge the contribution of Ciara Harris – without her word-play skills this study would have no name!

## FUNDING BODIES

1  
2  
3  
4  
5  
6 The study has been funded by two local charities, The Eveson Charitable  
7 Trust and The James Tudor Foundation.  
8

## 9 REFERENCES

- 10 1 Stroke Association (2013) Feeling Overwhelmed: the emotional impact of  
11 stroke Retrieved from:  
12 <http://www.stroke.org.uk/involved/feeling-overwhelmed-report>  
13 Accessed 19th June 2013  
14
- 15 2 Department of Health (2012) The National Clinical Guidelines for Stroke  
16 HMSO: London  
17
- 18 3 Royal College of Physicians (2013) Sentinel Stroke National Audit  
19 Programme Retrieved from: <https://www.strokeaudit.org/> Accessed  
20 19<sup>th</sup> June 2013  
21  
22
- 23 4 Duncan PW, Sullivan KJ, Behrman AL, Azen SP, Wu SS, Nadeau  
24 SE, Dobkin BH, Rose DK, Julie K, Tilson JK, Cen S and Hayden SK  
25 Body-Weight–Supported Treadmill Rehabilitation after Stroke. *The*  
26 *New England Journal of Medicine* 2011; 364:2026-2036  
27
- 28 5 Ferrarello F, Baccini M, Rinaldi LA, Cavallini MC, Mossello E,  
29 Masotti G, Marchionni N and Di Bari M Efficacy of  
30 physiotherapy interventions late after stroke: a meta-analysis *Journal*  
31 *of Neurology, Neurosurgery and Psychiatry* 2011;82: 136-143  
32
- 33 6 Forster A, Young J, Green J, Patterson C, Wanklyn P, Smith J,  
34 Murray J, Wild H, Bogle S and Lowson K Structured re-assessment  
35 system at 6 months after a disabling stroke: a randomised controlled  
36 trial with resource use and cost study *Age and Ageing* 2009; 38: 576–  
37 583  
38
- 39 7 Comprehensive Local Research Network conference (2013) Celebrating  
40 Achievements and Planning for the Future 1<sup>st</sup> July 2013, Stratford  
41 Manor Hotel, Stratford-upon-Avon  
42
- 43 8 McKeivitt C, Fudge N, Refern J, Sheldenkar A, Crichton S and Wolfe  
44 C UK stroke survivors needs survey London: *Stroke*  
45 *Association and Kings College London* 2011  
46  
47
- 48 9 Riessman CK Narrative Methods for the Human Sciences. 2008 Los  
49 Angeles, CA: Sage  
50
- 51 10 Welsh E Dealing with Data: using NVivo in the Qualitative Data  
52 Analysis Process. *Forum: Quantitative Social Research* 2002; 3: (2),  
53 Art. 26  
54  
55  
56  
57  
58  
59  
60

1  
2  
3  
4  
5  
6  
7  
8  
9  
10  
11  
12  
13  
14  
15  
16  
17  
18  
19  
20  
21  
22  
23  
24  
25  
26  
27  
28  
29  
30  
31  
32  
33  
34  
35  
36  
37  
38  
39  
40  
41  
42  
43  
44  
45  
46  
47  
48  
49  
50  
51  
52  
53  
54  
55  
56  
57  
58  
59  
60

11 Dalemans R, Wade DT, van den Heuvel WJA and de Witte LP Facilitating the participation of people with aphasia in research: a description of strategies: *Clinical Rehabilitation* 2009; 23: (10), 948-959

**Comment [PF8]:** Reference added in support of development of aphasia-friendly written materials

For peer review only
